1 **Crossing fitness valleys via double substitutions**  
2 **within codons**

3

4 Frida Belinky<sup>1</sup>, Itamar Sela<sup>1</sup>, Igor B. Rogozin<sup>1</sup>, Eugene V. Koonin<sup>1\*</sup>

5

6

7 <sup>1</sup>National Center for Biotechnology Information, National Library of Medicine, National Institutes of  
8 Health, Bethesda, Maryland, USA

9

10

11 **\*To whom correspondence should be addressed. Email:** koonin@ncbi.nlm.nih.gov

12

13 **Keywords:** natural selection, bacteria, archaea, short-term evolution, DNA context, double substitutions

14

## 15 **Abstract**

16 Single nucleotide substitutions in protein-coding genes can be divided into synonymous (S),  
17 with little fitness effect, and non-synonymous (N) ones that alter amino acids and thus generally  
18 have a greater effect. Most of the N substitutions are affected by purifying selection that  
19 eliminates them from evolving populations. However, additional mutations of nearby bases can  
20 modulate the deleterious effect of single substitutions and thus might be subject to positive  
21 selection. To elucidate the effects of selection on double substitutions in all codons, it is critical  
22 to differentiate selection from mutational biases. We approached this problem by comparing the  
23 fractions of double substitutions within codons to those of the equivalent double S substitutions  
24 in adjacent codons. Under the assumption that substitutions occur one at a time, all within-  
25 codon double substitutions can be represented as “ancestral-intermediate-final” sequences and  
26 can be partitioned into 4 classes: 1) SS: S intermediate – S final, 2) SN: S intermediate – N  
27 final, 3) NS: N intermediate – S final, 4) NN: N intermediate – N final. We found that the  
28 selective pressure on the second substitution markedly differs among these classes of double  
29 substitutions. Analogous to single S substitutions, SS evolve neutrally whereas, analogous to  
30 single N substitutions, SN are subject to purifying selection. In contrast, NS show positive  
31 selection on the second step because the original amino acid is recovered. The NN double  
32 substitutions are heterogeneous and can be subject to either purifying or positive selection, or  
33 evolve neutrally, depending on the amino acid similarity between the final or intermediate and  
34 the ancestral states. The general trend is that the second mutation compensates for the  
35 deleterious effect of the first one, resulting in frequent crossing of valleys on the fitness  
36 landscape.

37

38

39

40

## 41 Introduction

42 In classic population genetics, mutations are assumed to occur one at a time, independently of  
43 each other<sup>1-5</sup>. However, clustering of mutations, in particular, those occurring in adjacent sites  
44 (multi-nucleotide mutations) has been documented in many diverse organisms<sup>6-13</sup>. Multi-  
45 nucleotide substitutions potentially could originate from mutational biases, selection, or a  
46 combination of both. Recently, it has been claimed that positive selection is over-estimated by  
47 the branch-site test (BST) because many if not most of the sites supporting positive selection  
48 actually are multi-nucleotide substitutions that could result from multi-nucleotide mutations<sup>14</sup>.  
49 However, independent of BST, double substitutions within the same codon in protein-coding  
50 genes have been repeatedly claimed to be driven by positive selection. This conclusion follows  
51 from the comparison of the observed frequencies of double substitutions to those expected from  
52 the frequencies of single substitutions. If the frequency of a double substitution is significantly  
53 greater than the product of the frequencies of the respective single substitutions, positive  
54 selection is inferred<sup>15-17</sup>. Such apparent signs of positive selection affecting double substitutions  
55 have been detected as a general trend in the mouse-rat lineage<sup>15</sup>. Similar conclusions have  
56 been reached for double substitutions in codons for serine, the only amino acid that is encoded  
57 by two disjoint series of codons. In the case of serine, the proposed scenario is that a non-  
58 synonymous (N) substitution that leads to the replacement of a serine with another amino acid  
59 and is hence deleterious is followed by a second substitution that restores serine and,  
60 accordingly, the protein function and the original fitness value<sup>17</sup>. The fixation of the second  
61 mutation has been attributed to positive selection, and the observed excessive frequency of  
62 double substitutions has been explained by this effect of selection, as opposed to a mutational  
63 bias.

64 Similarly, signatures of positive selection have been found for double substitutions in stop  
65 codons in bacteria (UAG>UGA and UGA>UAG), which could be attributed to the deleterious,  
66 non-stop intermediate state, UGG<sup>16</sup>. Furthermore, slightly advantageous back mutations are  
67 expected under the nearly neutral model<sup>18</sup>. Thus, a second mutation in a codon that reverts a  
68 non-synonymous substitution to restore the codon for the original amino acid, generally, is  
69 expected to be advantageous. However, given that the apparent positive selection in codon  
70 double substitutions could be potentially explained by biased mutational processes that favor  
71 multi-nucleotide substitutions<sup>6,9,14,17,19</sup>, it is essential to compare codon double substitutions to  
72 an appropriate null model in order to accurately infer selection.

73 Following the well-established principles of identification of selective pressure by comparison of  
74 non-synonymous to synonymous rates<sup>20-26</sup>, to assess the selection that affects double

75 substitutions within codons, we compared the double fraction (DF) of each such double  
76 substitution to the DF of adjacent equivalent double synonymous substitutions. We categorize  
77 codon double substitution into four classes and show that these classes of codon double  
78 substitution are associated with different types of selection acting on the second substitution  
79 step.

80

## 81 **Results**

### 82 **Inference of selection on codon double substitutions by comparison to null models**

83 From triplets of genomes with reliable phylogenetic relationships that were extracted from the  
84 ATGC database <sup>17,27</sup>, we obtained frequencies of double and single substitutions in codons, and  
85 in double synonymous controls (see Methods for details). The key difference between the  
86 present work and the previous studies is that all the analyses included comparison to double  
87 synonymous substitutions that served as null models for the double substitutions in codons.  
88 Although it is well known that transition and transversion rates differ substantially <sup>22,28,29</sup>, it is  
89 unclear to what extent the adjacency of mutations is affected by base composition. For  
90 example, DNA polymerase  $\eta$  tends to produce an excessive amount of simultaneous double  
91 transitions in A/T-rich context <sup>30</sup> whereas DNA polymerase  $\zeta$  frequently produces transversions  
92 in C/G-rich context <sup>31,32</sup>. Another important issue is the balance between consecutive double  
93 substitutions (independent stepwise fixation of adjacent mutations) and simultaneous double  
94 substitutions. This issue cannot be ignored because some replication enzymes are known to  
95 produce or initiate production of excessive amounts of simultaneous double substitutions under  
96 certain conditions <sup>33-37</sup>. Therefore, we compared the frequencies of all codon double  
97 substitutions to all possible types of double synonymous substitutions that were captured in two  
98 null models (Fig. 1). The first null model (syn\_31) included a synonymous substitution in the 3<sup>rd</sup>  
99 position of a codon followed by another synonymous substitution in the 1<sup>st</sup> position of the next  
100 codon. The second null model (syn\_33) included non-adjacent synonymous substitutions in 3<sup>rd</sup>  
101 codon positions of consecutive codons. We found that the double fraction (DF), i.e. the  
102 observed double substitution frequency divided by sum of the cumulative single substitution  
103 frequency and the double frequency (see Methods for further details) was typically higher for the  
104 syn\_31 model compared to the syn\_33 model suggesting the existence of a mutational bias in  
105 adjacent positions (Fig. 1). This difference was only statistically significant under the t-test but  
106 not with the non-parametric U-test.

107 The DF is assumed to be proportional to the second step substitution rate. If the elevated DF of  
108 codon double substitutions results solely from a multi-nucleotide mutational bias, the  
109 comparison to the null model is expected to show no significant difference. Conversely, a  
110 significantly lower DF compared to that of the null model is indicative of purifying selection,  
111 whereas a significantly higher DF points to positive selection.

112

### 113 **Distinct selection regimes for different types of codon double substitutions**

114 Representing all within-codon double substitutions in the general form, “ancestral-intermediate-  
115 final”, we define the following 4 combinations (Fig. 2A): 1) SS: S intermediate – S final, 2) SN: S  
116 intermediate – N final, 3) NS: N intermediate – S final, 4) NN: N intermediate – N final.

117 Additionally, we compare the DF between fast and slow evolving genes (see Methods).

118 Changes that are subject to purifying selection are compatible with a higher DF in fast vs. slow  
119 evolving genes, and conversely, changes driven by positive selection are compatible with a  
120 higher DF in slow vs. fast evolving genes.

121 The results of these analyses reveal distinct selection regimes for the 4 classes of codon double  
122 substitutions (Fig. 2B). For the SS changes, neutrality cannot be rejected, the SN changes are  
123 subject to purifying selection, the NS changes are driven by positive selection, and NN changes  
124 exhibit a mixture of all three regimes depending on the similarity of the amino acids encoded by  
125 the intermediate and final codons to the original amino acid.

#### 126 **SS: double synonymous substitutions**

127 For double synonymous substitutions, neutrality cannot be rejected by comparison to both null  
128 models using the U-test, which is the appropriate test for this small sample size (Fig. 3A). Thus,  
129 the DF values of the SS substitutions can be explained by the frequency of multi-nucleotide  
130 mutations suggesting that SS double substitutions evolve (nearly) neutrally, similar to single  
131 synonymous substitutions (Fig. S1). Additionally, there was no significant difference between  
132 the DF values of SS double substitutions in fast and slow evolving genes (Fig. 3A) which is  
133 compatible with the neutral evolutionary regime. Nevertheless, although the bulk analysis of the  
134 SS substitutions yields results compatible with neutrality, most of the individual SS cases seem  
135 to involve weak positive selection after the BH correction, which can be linked to codon bias  
136 (Fig. S2).

#### 137 **SN: synonymous substitution followed by a non-synonymous one**

138 The DF values for SN double substitutions are significantly lower than those for both syn\_31  
139 and syn\_33 null models (Fig. 3B), indicating that the second step of these double substitutions  
140 is subject to purifying selection. Similarly to single non-synonymous substitutions (Fig. S1), the  
141 SN doubles show significantly higher DF values in fast evolving genes compared to slow  
142 evolving genes (Fig. 3B), which is also indicative of purifying selection. Analysis of individual  
143 cases of SN substitutions, after the BH correction, showed that 88% were compatible with  
144 purifying selection, for 10% neutrality could not be rejected, and less than 2% were compatible  
145 with positive selection (see Supplementary file for details).

#### 146 **NS: non-synonymous substitution followed by a synonymous one**

147 The NS double substitutions show significantly higher DF values compared to both null models  
148 (Fig. 3C). This pattern is compatible with positive selection driving the second substitution which  
149 returns to the original amino acid state. The NS double substitutions also show higher DF in  
150 slow compared to fast evolving genes, which is compatible with positive selection (Fig. 3C).  
151 Analysis of individual NS double substitutions, after BH correction, resulted in 15 of the 16  
152 cases that exhibit positive selection (93%). The only exception is TTG>CTC, for which the DF of  
153 the NS change was greater than that of the null model, but the difference was not statistically  
154 significant.

155

#### 156 **NN: double non-synonymous substitutions**

157 For the NN double substitutions, detailed comparison of individual cases reveals a mixture of  
158 positive selection, purifying selection and neutral evolution. a. Neutrality cannot be rejected by  
159 the comparison of the DF values of NN doubles to the syn\_31 null model. In contrast, the  
160 comparison between slow and fast evolving genes shows that DF of NN doubles is higher in  
161 slow compared to fast evolving genes, which is compatible with positive selection. Given this  
162 discrepancy between the results of the two tests, we performed an individual comparison for  
163 each NN change, with the same mutation types in the corresponding null model. This analysis  
164 of individual NN double substitutions (Table S1), after BH correction for multiple testing,  
165 demonstrated positive selection for 44% of the NN doubles, purifying selection for 19%, and  
166 neutral evolution for 36% (Fig. 3D).

167

#### 168 **Modes of selection reflect amino-acid similarity**

169 We hypothesized that the split of the NN into those evolving under positive selection, purifying  
170 selection or neutrally had to do with the (dis)similarity between the original, intermediate and  
171 final amino acid residues (Figure 1A). To test this hypothesis, we compared the differences in  
172 amino-acid similarity (DAS) between the subsets of NN, SN and NS doubles for which positive  
173 selection, purifying selection, or a neutral evolution regime were detected (Figure 4). This  
174 difference was calculated as  $DAS = S_{of} - S_{oi}$  where  $S_{of}$  and  $S_{oi}$  are the similarity measures between  
175 the original and the final or intermediate amino acids, respectively. The measures of similarity  
176 between amino acid residues were extracted from 94 amino-acid similarity matrices that are  
177 available in the AAindex database<sup>38</sup>. For 85 of the 94 matrices, there was a significant  
178 difference between the DAS values of NN cases under positive selection compared to those  
179 under purifying selection. For most of the cases in the positively selected subset,  $DAS > 0$ , i.e.  
180 the final amino acid is significantly more similar to the original than the intermediate amino acid.  
181 Conversely, for most of the cases in the negatively selected subset of the NN doubles,  $DAS < 0$ ,  
182 i.e. the second mutation decreases the similarity of the amino acid in the given position to the  
183 original one. Significant differences between positive vs. neutral, and neutral vs. negative  
184 subsets were observed as well albeit with fewer matrices (74 and 62, respectively). Focusing on  
185 5 similarity/distance matrices that are based solely on psychochemical properties and thus rule  
186 out potential circular reasoning, we observed a significant difference between the DAS values  
187 for the NN cases under positive and purifying selection, and between the cases under positive  
188 selection and neutral evolution. However, the difference between the neutral cases and those  
189 under purifying selection was not significant.

190 We performed analogous comparisons also for the SN and NS classes of doubles substitutions.  
191 Although in each of the SN and NS cases, there is only one non-synonymous, with only two  
192 amino acids involved, the DAS values can be formally calculated by including the ancestral vs  
193 intermediate and the ancestral-final amino acid self-comparisons for SN and NS, respectively.  
194 For the SN cases, 78 of the 94 matrices yielded a significant difference between the negative  
195 and neutral groups, i.e. the final amino acid is less similar to the original one in the cases of  
196 purifying selection compared to neutral cases. For 56 matrices, there was a significant  
197 difference between the positive and negative groups, but only 5 matrices showed a significant  
198 difference between the positive and neutral groups. For the 5 similarity/distance matrices that  
199 are based solely on psychochemical properties, only the difference between the neutral and  
200 negative groups was significant. For the NS cases, there was no significant difference between  
201 the 15 positive cases and the single neutral case. The lack of statistical support in the latter  
202 comparisons is most likely due to the small number of positive cases for the SN class and,  
203 conversely, the dominance of positive selection in the NS class.

204

### 205 **Additional controls for mutational biases**

206 For the SN, NS, and NN doubles, similar results were obtained when transitions and  
207 transversions were analyzed separately (Fig. S3) and when double substitutions in non-coding  
208 regions were used as null-models instead of the syn\_31 or syn\_33 models (Fig. S4). The only  
209 exception were the SS doubles which had a greater DF compared to non-coding double  
210 substitutions (Fig. S3). This finding is likely explained by the purifying selection that, on average,  
211 affects non-coding regions to a greater extent than synonymous codon positions<sup>39</sup>.

212

### 213 **Contribution of simultaneous double mutations**

214 We estimated the frequency of simultaneous double mutations by calculating the difference  
215 between the observed double frequency in the null models, and the product of single  
216 synonymous substitutions (see methods). The estimated frequencies of the double mutations  
217 range from zero to 0.11, with the means of 0.0015 and 0.02 for syn33 and syn31, respectively.  
218 These frequencies are not negligible as they account for a mean of 53% of the double  
219 substitution frequency in syn33 and for 66% in syn31 (Fig. S5). Although the DF is not  
220 significantly different between syn33 and syn31, the estimated proportion of simultaneous  
221 mutations is (Fig. S5). The product of the single substitution frequencies in the controls is  
222 nonetheless strongly correlated with the double frequency (Pearson correlation coefficients  
223  $r=0.93$  for syn33 and  $r=0.76$  for syn31). A significant correlation was also observed between the  
224 single and double frequencies in all four classes of double substitutions (Fig. S6). We further  
225 verified that, for the NS cases, the observed frequencies of double substitutions were  
226 significantly higher than expected from the frequencies of single substitutions, with the addition  
227 of simultaneous double mutations rates estimated from the controls (paired t-test  $p\text{-val}=6.9\times 10^{-}$   
228  $04$  and signed rank test  $p\text{-val}=0.0011$ ). This result presents further evidence that, although  
229 simultaneous double mutations contribute to the observed double substitution frequency and to  
230 the DF, they cannot account for the elevated values in NS. Thus, the increase in DF in these  
231 cases can only be attributed to positive selection.

232

233

234



## 235 Discussion

236 The central goal of this work was to comprehensively characterize the selective landscape of  
237 codon double substitutions by accurately taking account the mutational biases in the inference  
238 of selection. The control for mutation biases was achieved by comparing the DF for codon  
239 double substitutions to those of double synonymous substitutions. Previously analyzed codon  
240 double substitutions in serine codons<sup>17</sup> and in stop codons<sup>16</sup> suggested that these changes are  
241 under positive selection due to elevated double substitution frequencies compare to the  
242 expectation from single substitutions. Our focus here was to infer the type of selection by using  
243 more adequate controls, namely equivalent synonymous double substitutions, in order to  
244 address the possibility that apparent selection affecting codon double substitutions was due to  
245 mutational biases as previously suggested<sup>9,14</sup>. Indeed, we observed that adjacent double  
246 synonymous substitutions (syn\_31) had a higher DF compared to the corresponding non-  
247 adjacent substitutions (syn\_33), although this difference was not statistically significant (Fig.  
248 1E).

249 Partitioning of codon double substitutions into 4 classes based on the (non)synonymy of the  
250 intermediate and final codon to the ancestral codon (SS, SN, NS and NN) predicts the type of  
251 selection affecting the second step of the respective double substitutions (Fig. 1). In fact, this  
252 classification is a simple derivative of the classification of single substitutions in protein coding  
253 genes into synonymous substitutions that are generally assumed to evolve neutrally, and non-  
254 synonymous substitutions most of which are subject to purifying selection<sup>20</sup> (Fig. S1). The  
255 classes of double substitutions are the four possible combinations of synonymous and non-  
256 synonymous substitutions at each step. Because the state resulting from the second step is the  
257 one that is fixed during evolution, the nature of this step largely defines the selective regime of  
258 the double substitution perceived as one evolutionary event (Fig. 2A). Thus, SS doubles are  
259 effectively neutral. The SN doubles that drive an amino acid site away from the original state are  
260 generally subject to purifying selection, the strength of which depends on the similarity between  
261 the new amino acid introduced by the second substitution and the original amino acid. The few  
262 SN cases that appear to be driven by positive selection all involve conservative amino acid  
263 replacements and might reflect a hitherto unrecognized process of adaptive fine-tuning of  
264 protein structures. Alternatively, this apparent positive selection could be an artifact caused  
265 context-specific mutational biases. The NS doubles that return the site to the ancestral state are  
266 positively selected because, by definition, in all these cases, the similarity of the final (same as  
267 ancestral) amino acid to the ancestral one is always greater compared to the intermediate. The  
268 NN doubles are heterogeneous, evolving either under purifying selection or under positive

269 selection depending on which amino acid, intermediate or final, is more similar to the ancestral  
270 one. Notably, the DAS values are not always positive for the NN cases under positive selection,  
271 as generally expected. This is most likely due to the fact that each amino acid substitution  
272 matrix accurately reflects similarity in certain properties but not others, and thus, does not  
273 equally well apply to all amino acid replacements. No single matrix is expected to be fully  
274 compatible with selection regimes on codon substitutions because they represent a mixture of  
275 numerous proteins from many environments that are subject to different sets of functional  
276 constraints.

277 Overall, the results of the present, comprehensive analysis of the evolutionary regimes of  
278 double substitutions reaffirm the predominantly conservative character of protein evolution<sup>5,40</sup>.  
279 In bulk, all classes of double substitutions can be viewed as evolving under purifying selection if  
280 the double is taken as one evolutionary event. The positive selection detected for the second  
281 steps of the NS and many NN doubles is a consequence of the deleterious effect of the first  
282 substitution. The conclusion on the overall dominance of purifying selection is further supported  
283 by the comparison of double substitutions in fast vs. slow evolving genes. In accord with the  
284 identified purifying selection on SN cases, these have significantly greater DF in fast evolving  
285 genes, similar to the higher rate of single non-synonymous changes in fast evolving genes  
286 compared to slow evolving ones. Conversely, those NS and NN substitutions, for which the  
287 second step was found to be driven by positive selection, showed a higher DF in slow evolving  
288 genes.

289 Compensation for the effects of deleterious mutations through subsequent positive selection  
290 has been previously hypothesized and demonstrated in other evolutionary contexts<sup>41-43</sup>. A  
291 major implication of the present results is that fitness valleys are commonly crossed in codon  
292 evolution as a result of positive selection that follows a deleterious non-synonymous mutation  
293 and that this route of evolution is, in large part, determined by the organization of the genetic  
294 code itself.

295

296

## 297 **Materials and methods**

### 298 **Datasets**

299 Genomic data for bacteria and archaea were obtained from an updated version of the ATGC  
300 (Alignable Tight Genome Clusters) database<sup>27</sup>. To reconstruct the history of nucleotide  
301 substitutions in protein-coding DNA under the parsimony principle, we used triplets of closely  
302 related species as previously described<sup>16,17,44</sup>. Alignments of all sequences in each ATGC COG  
303 (Cluster of Orthologous Genes) were constructed using the MAFFT software with the `-linsi`  
304 parameter<sup>45</sup>. The genes were divided into slow and fast evolving ones by comparing the dN/dS  
305 value of each gene to the median dN/dS among all genome triplets in the given ATGC.

### 306 **Analysis of codon double substitutions**

307 For each codon change, the frequency of change to any other codon was calculated as the  
308 number of such changes divided by the number of ancestral reconstructions of the given codon.  
309 For each double substitution, the double fraction (DF) was calculated as the observed double  
310 substitution frequency divided by the cumulative single substitution frequency plus the double  
311 frequency. For example, for the change AAA→GGA, the DF was the observed frequency of  
312 AAA→GGA divided by the cumulative counts of AAA→GAA and AAA→AGA and AAA→GGA  
313 (under the assumption that the double substitution occurred as a result of two consecutive  
314 single substitutions). Thus, for each double substitution, the following values were collected and  
315 estimated:

- 316 1) The double substitution count.
- 317 2) The cumulative single substitution count (which is the sum of the two single counts and the  
318 double count).
- 319 3) The ancestral state count – count of all cases where the originating codon is inferred as  
320 ancestral under the parsimony principal.
- 321 4) double substitution frequency – ‘double substitution count’ / ‘ancestral state count’.
- 322 5) single cumulative frequency – ‘single substitution count’ / ‘ancestral state count’.
- 323 6) double fraction (DF) – double substitution frequency divided by cumulative single frequency –  
324 equivalent to the double substitution count divided by the cumulative single substitution count.

### 325 **Assignment of codon double substitution types**

326 For each codon double substitution, there are two distinct paths from the ancestral codon state  
327 to the final (derived) codon state, where each step in the path is a single substitution to or from  
328 an intermediate codon state. Each step can be either synonymous or non-synonymous, and the

329 ancestral vs. final codon also can be either synonymous or non-synonymous. Some codon  
330 substitutions include a stop codon as the intermediate in one of the paths; these cases were  
331 disregarded in the current analysis. Each codon double substitution was assigned one of the 4  
332 combination types based on the (non)synonymy of the ancestral to the intermediate codons,  
333 and the (non)synonymy of the ancestral vs. the final codon state. The 4 classes are as follows: -  
334 1) SS, codon double substitutions in which both intermediates and the final codon are all  
335 synonymous  
336 2) SN, codon double substitutions in which at least one intermediate is synonymous whereas  
337 the final codon is non-synonymous to the ancestral codon  
338 3) NS, codon double substitutions in which one of the intermediates is non-synonymous  
339 whereas the final codon is synonymous to the ancestral codon  
340 4) NN, codon double substitutions in which both intermediates are non-synonymous, and the  
341 final codon is also non-synonymous to the ancestral one.

#### 342 **Analysis of double synonymous substitutions in adjacent codons: the null models**

343 For double synonymous substitutions in adjacent codons, we collected the same data as for the  
344 codon double substitutions, in codon-like 3-base sequences with 3 configurations:

- 345 A. A constant 2<sup>nd</sup> codon positions followed by a 4-fold degenerate site in the 3<sup>rd</sup> codon  
346 positions which is followed by a 2-fold degenerate site in the 1<sup>st</sup> codon position of the  
347 next codon (Fig. 1A).
- 348 B. A 4-fold degenerate site in the 3<sup>rd</sup> codon positions which is followed by a 2-fold  
349 degenerate site in the 1<sup>st</sup> codon position of the next codon, which is followed by a  
350 constant base in the 2<sup>nd</sup> codon position of the second codon (Fig. 1B).
- 351 C. A 4-fold degenerate site in the 3<sup>rd</sup> codon positions which is followed by a constant 1<sup>st</sup>  
352 codon position in the second codon of which the 2<sup>nd</sup> position is disregarded and followed  
353 by a 4-fold degenerate site in the 3<sup>rd</sup> codon position (Fig. 1C).

354 The first codon in configurations A and B can be any of the 4-fold degenerate codons, i.e.,  
355 codons for L, V, S, P, Y, A, R and G, and the second codon in these configurations can be either  
356 a codon for either R or L which are the only two amino acids that have a degenerate 1<sup>st</sup> codon  
357 position. An additional restriction for configurations A and B is that the ancestral state of the 3<sup>rd</sup>  
358 codon position of the 2<sup>nd</sup> codon is a purine (A/G) because only then can the 1<sup>st</sup> codon

359 substitution be synonymous. The 1<sup>st</sup> and 2<sup>nd</sup> codons of configuration C can be any of the 4-fold  
360 degenerate codons.

361

### 362 **Analysis of double substitutions in non-coding intergenic regions**

363 Codon double substitutions were also compared to double substitutions in non-coding intergenic  
364 regions. The same analysis was performed on all possible frames of the aligned non-coding  
365 sequences as for the coding genes, treating base triplets of bases as codons.

### 366 **Estimation of simultaneous double mutation frequency**

367 In the null models syn31 and syn33, the expected frequency of double substitutions, in the  
368 absence of simultaneous double mutations, can be estimated by the product of the frequencies  
369 of single synonymous substitutions. Because both single substitutions are synonymous, the  
370 effect of their order is assumed to be minimal. Thus, the estimated contribution of simultaneous  
371 double mutations in these cases is the difference between the observed double substitution  
372 frequency and the product of the corresponding single substitutions. In 12 of the 634 cases, the  
373 observed double frequency was smaller than the product of single substitution frequencies;  
374 these cases were ignored. We further estimated the expected rate of NS substitutions, under  
375 the assumption of neutrality at the second step, as the weighted mean of the products of each  
376 of the corresponding single substitution frequencies multiplied by the equivalent null model's  
377 synonymous frequency which is expected if the second step is neutral. To each expected NS  
378 value, the estimated simultaneous double mutational rate was added. If the observed frequency  
379 of NS double substitutions can be explained by simultaneous double mutations, then the  
380 expected rate plus the double mutational rate should be equal to the observed NS frequency.  
381 Thus, to assess the contribution of selection, the expected frequency (after adding the double  
382 mutation frequency) was subtracted from the observed double substitution frequency.

### 383 **Statistical tests**

384 Two samples t-test and the non-parametric Wilcoxon Ranksum test were used to compare the  
385 DF values between each of the codon double substitution types (SS, SN, NS, NN) and each of  
386 the null models (syn-31, syn-33) and between each of the codon double substitution types and  
387 adjacent and non-adjacent double substitutions in non-coding intergenic regions. Alpha level for  
388 significance was 0.01.

389 Paired t-test and signed rank test were used to compare between the DF of different codon  
390 double substitution types in fast vs. slow evolving genes. Alpha level for significance was 0.01.

391 Fisher's exact test was used to compare the number of double codon substitutions to single  
392 cumulative substitutions, to test for significant differences in the DF between a specific codon  
393 double substitution and the comparable null model. For example, the codon double substitution  
394 GCC→GTA, which changes the encoded amino acid from A to V, is compared to the null model  
395 of two adjacent synonymous substitutions with configuration A (Fig. 1A) where the 1<sup>st</sup> base is G  
396 in the 2<sup>nd</sup> codon position, followed by a synonymous C→T change in a 4-fold degenerate 3<sup>rd</sup>  
397 codon position and by a synonymous C→A change in the 1<sup>st</sup> codon position of the next codon  
398 (coding for R). An example of the comparison for the non-adjacent codon double substitution  
399 CTT→TTA is detailed in Fig. 1D. The Benjamini–Hochberg procedure was used to correct for  
400 multiple testing, with alpha of 0.05.

401

## 402 References

- 403
- 404 1 McCandlish, D. M. & Stoltzfus, A. Modeling evolution using the probability of fixation: history  
405 and implications. *Q Rev Biol* **89**, 225-252 (2014).
- 406 2 Felsenstein, J. Evolutionary trees from DNA sequences: a maximum likelihood approach. *Journal*  
407 *of molecular evolution* **17**, 368-376 (1981).
- 408 3 Blair, C. & Murphy, R. W. Recent trends in molecular phylogenetic analysis: where to next? *J*  
409 *Hered* **102**, 130-138, doi:10.1093/jhered/esq092 (2011).
- 410 4 Yang, Z. & Rannala, B. Molecular phylogenetics: principles and practice. *Nat Rev Genet* **13**, 303-  
411 314, doi:10.1038/nrg3186 (2012).
- 412 5 Kimura, M. *The neutral theory of molecular evolution*. (Cambridge University Press, 1983).
- 413 6 Averof, M., Rokas, A., Wolfe, K. H. & Sharp, P. M. Evidence for a high frequency of simultaneous  
414 double-nucleotide substitutions. *Science* **287**, 1283-1286 (2000).
- 415 7 Drake, J. W., Bebenek, A., Kissling, G. E. & Peddada, S. Clusters of mutations from transient  
416 hypermutability. *Proceedings of the National Academy of Sciences of the United States of*  
417 *America* **102**, 12849-12854, doi:10.1073/pnas.0503009102 (2005).
- 418 8 Drake, J. W. Too many mutants with multiple mutations. *Crit Rev Biochem Mol Biol* **42**, 247-258,  
419 doi:10.1080/10409230701495631 (2007).
- 420 9 Schridder, D. R., Hourmozdi, J. N. & Hahn, M. W. Pervasive multinucleotide mutational events in  
421 eukaryotes. *Current biology : CB* **21**, 1051-1054, doi:10.1016/j.cub.2011.05.013 (2011).
- 422 10 Stone, J. E., Lujan, S. A., Kunkel, T. A. & Kunkel, T. A. DNA polymerase zeta generates clustered  
423 mutations during bypass of endogenous DNA lesions in *Saccharomyces cerevisiae*. *Environ Mol*  
424 *Mutagen* **53**, 777-786, doi:10.1002/em.21728 (2012).
- 425 11 Terekhanova, N. V., Bazykin, G. A., Neverov, A., Kondrashov, A. S. & Seplyarskiy, V. B. Prevalence  
426 of multinucleotide replacements in evolution of primates and *Drosophila*. *Molecular biology and*  
427 *evolution* **30**, 1315-1325, doi:10.1093/molbev/mst036 (2013).
- 428 12 Harris, K. & Nielsen, R. Error-prone polymerase activity causes multinucleotide mutations in  
429 humans. *Genome research* **24**, 1445-1454, doi:10.1101/gr.170696.113 (2014).
- 430 13 Besenbacher, S. *et al.* Multi-nucleotide de novo Mutations in Humans. *PLoS genetics* **12**,  
431 e1006315, doi:10.1371/journal.pgen.1006315 (2016).
- 432 14 Venkat, A., Hahn, M. W. & Thornton, J. W. Multinucleotide mutations cause false inferences of  
433 lineage-specific positive selection. *Nature ecology & evolution*, doi:10.1038/s41559-018-0584-5  
434 (2018).
- 435 15 Bazykin, G. A., Kondrashov, F. A., Ogurtsov, A. Y., Sunyaev, S. & Kondrashov, A. S. Positive  
436 selection at sites of multiple amino acid replacements since rat-mouse divergence. *Nature* **429**,  
437 558-562, doi:10.1038/nature02601 (2004).
- 438 16 Belinky, F., Babenko, V. N., Rogozin, I. B. & Koonin, E. V. Purifying and positive selection in the  
439 evolution of stop codons. *Scientific reports* **8**, 9260, doi:10.1038/s41598-018-27570-3 (2018).
- 440 17 Rogozin, I. B. *et al.* Evolutionary switches between two serine codon sets are driven by selection.  
441 *Proceedings of the National Academy of Sciences of the United States of America* **113**, 13109-  
442 13113, doi:10.1073/pnas.1615832113 (2016).
- 443 18 Charlesworth, J. & Eyre-Walker, A. The other side of the nearly neutral theory, evidence of  
444 slightly advantageous back-mutations. *Proceedings of the National Academy of Sciences of the*  
445 *United States of America* **104**, 16992-16997, doi:10.1073/pnas.0705456104 (2007).
- 446 19 Koonin, E. V. & Gorbalenya, A. E. Tale of two serines. *Nature* **338**, 467-468,  
447 doi:10.1038/338467b0 (1989).
- 448 20 Kimura, M. The neutral theory of molecular evolution. *Scientific American* **241**, 98-100, 102, 108  
449 passim (1979).
- 450 21 Kimura, M. A simple method for estimating evolutionary rates of base substitutions through  
451 comparative studies of nucleotide sequences. *Journal of molecular evolution* **16**, 111-120 (1980).

- 452 22 Gojobori, T., Li, W. H. & Graur, D. Patterns of nucleotide substitution in pseudogenes and  
453 functional genes. *Journal of molecular evolution* **18**, 360-369 (1982).
- 454 23 Li, W. H., Wu, C. I. & Luo, C. C. A new method for estimating synonymous and nonsynonymous  
455 rates of nucleotide substitution considering the relative likelihood of nucleotide and codon  
456 changes. *Molecular biology and evolution* **2**, 150-174,  
457 doi:10.1093/oxfordjournals.molbev.a040343 (1985).
- 458 24 Nei, M. & Gojobori, T. Simple methods for estimating the numbers of synonymous and  
459 nonsynonymous nucleotide substitutions. *Molecular biology and evolution* **3**, 418-426,  
460 doi:10.1093/oxfordjournals.molbev.a040410 (1986).
- 461 25 Li, W. H. Unbiased estimation of the rates of synonymous and nonsynonymous substitution.  
462 *Journal of molecular evolution* **36**, 96-99 (1993).
- 463 26 Pamilo, P. & Bianchi, N. O. Evolution of the Zfx and Zfy genes: rates and interdependence  
464 between the genes. *Molecular biology and evolution* **10**, 271-281,  
465 doi:10.1093/oxfordjournals.molbev.a040003 (1993).
- 466 27 Kristensen, D. M., Wolf, Y. I. & Koonin, E. V. ATGC database and ATGC-COGs: an updated  
467 resource for micro- and macro-evolutionary studies of prokaryotic genomes and protein family  
468 annotation. *Nucleic acids research* **45**, D210-D218, doi:10.1093/nar/gkw934 (2017).
- 469 28 Topal, M. D. & Fresco, J. R. Complementary base pairing and the origin of substitution  
470 mutations. *Nature* **263**, 285-289 (1976).
- 471 29 Lee, H., Popodi, E., Tang, H. & Foster, P. L. Rate and molecular spectrum of spontaneous  
472 mutations in the bacterium *Escherichia coli* as determined by whole-genome sequencing.  
473 *Proceedings of the National Academy of Sciences of the United States of America* **109**, E2774-  
474 2783, doi:10.1073/pnas.1210309109 (2012).
- 475 30 Matsuda, T. *et al.* Error rate and specificity of human and murine DNA polymerase  $\epsilon$ . *J Mol Biol*  
476 **312**, 335-346, doi:10.1006/jmbi.2001.4937 (2001).
- 477 31 Harfe, B. D. & Jinks-Robertson, S. DNA polymerase zeta introduces multiple mutations when  
478 bypassing spontaneous DNA damage in *Saccharomyces cerevisiae*. *Mol Cell* **6**, 1491-1499 (2000).
- 479 32 Stone, J. E. *et al.* Low-fidelity DNA synthesis by the L979F mutator derivative of *Saccharomyces*  
480 *cerevisiae* DNA polymerase zeta. *Nucleic acids research* **37**, 3774-3787, doi:10.1093/nar/gkp238  
481 (2009).
- 482 33 Seidman, M. M., Bredberg, A., Seetharam, S. & Kraemer, K. H. Multiple point mutations in a  
483 shuttle vector propagated in human cells: evidence for an error-prone DNA polymerase activity.  
484 *Proceedings of the National Academy of Sciences of the United States of America* **84**, 4944-4948  
485 (1987).
- 486 34 Chen, Z., Feng, J., Buzin, C. H. & Sommer, S. S. Epidemiology of doublet/multiplet mutations in  
487 lung cancers: evidence that a subset arises by chronocoordinate events. *PLoS one* **3**, e3714,  
488 doi:10.1371/journal.pone.0003714 (2008).
- 489 35 Chan, K. & Gordenin, D. A. Clusters of Multiple Mutations: Incidence and Molecular  
490 Mechanisms. *Annu Rev Genet* **49**, 243-267, doi:10.1146/annurev-genet-112414-054714 (2015).
- 491 36 Burch, L. H. *et al.* Damage-induced localized hypermutability. *Cell Cycle* **10**, 1073-1085,  
492 doi:10.4161/cc.10.7.15319 (2011).
- 493 37 Chen, J. M., Ferec, C. & Cooper, D. N. Complex Multiple-Nucleotide Substitution Mutations  
494 Causing Human Inherited Disease Reveal Novel Insights into the Action of Translesion Synthesis  
495 DNA Polymerases. *Human mutation* **36**, 1034-1038, doi:10.1002/humu.22831 (2015).
- 496 38 Kawashima, S. *et al.* AAindex: amino acid index database, progress report 2008. *Nucleic acids*  
497 *research* **36**, D202-205, doi:10.1093/nar/gkm998 (2008).
- 498 39 Thorpe, H. A., Bayliss, S. C., Hurst, L. D. & Feil, E. J. Comparative Analyses of Selection Operating  
499 on Nontranslated Intergenic Regions of Diverse Bacterial Species. *Genetics* **206**, 363-376,  
500 doi:10.1534/genetics.116.195784 (2017).
- 501 40 Li, W. *Molecular evolution*. (Sinauer associates incorporated, 1997).



- 502 41 Gokhale, C. S., Iwasa, Y., Nowak, M. A. & Traulsen, A. The pace of evolution across fitness  
503 valleys. *Journal of theoretical biology* **259**, 613-620, doi:10.1016/j.jtbi.2009.04.011 (2009).
- 504 42 Covert, A. W., 3rd, Lenski, R. E., Wilke, C. O. & Ofria, C. Experiments on the role of deleterious  
505 mutations as stepping stones in adaptive evolution. *Proceedings of the National Academy of  
506 Sciences of the United States of America* **110**, E3171-3178, doi:10.1073/pnas.1313424110  
507 (2013).
- 508 43 Szamecz, B. *et al.* The genomic landscape of compensatory evolution. *PLoS Biol* **12**, e1001935,  
509 doi:10.1371/journal.pbio.1001935 (2014).
- 510 44 Belinky, F., Rogozin, I. B. & Koonin, E. V. Selection on start codons in prokaryotes and potential  
511 compensatory nucleotide substitutions. *Scientific reports* **7**, 12422, doi:10.1038/s41598-017-  
512 12619-6 (2017).
- 513 45 Katoh, K., Kuma, K., Miyata, T. & Toh, H. Improvement in the accuracy of multiple sequence  
514 alignment program MAFFT. *Genome informatics. International Conference on Genome  
515 Informatics* **16**, 22-33 (2005).
- 516
- 517

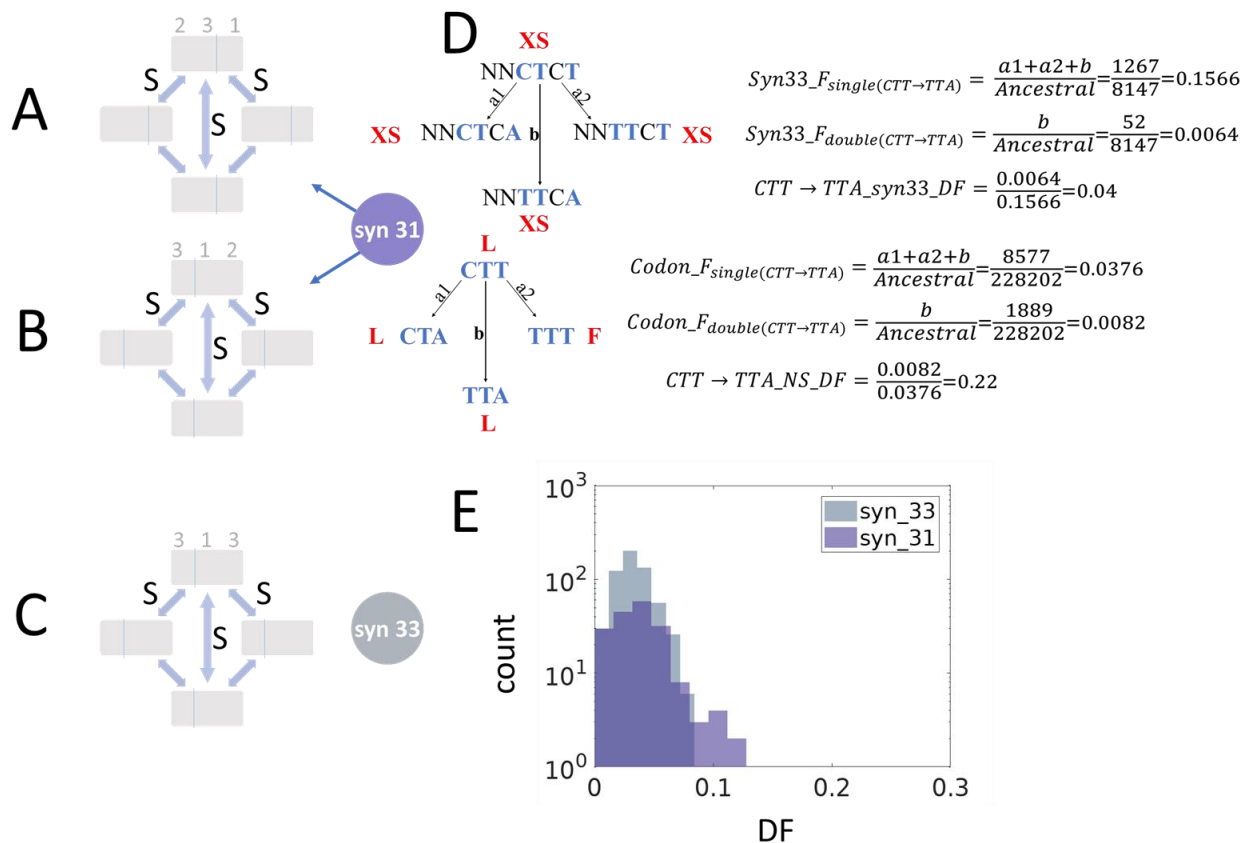

518  
519 **Figure 1. Double synonymous substitutions in adjacent codons used as null models and**  
520 **calculation of DF.**

- 521 (A) A constant 2nd codon positions followed by a 4-fold degenerate site in the 3rd codon  
522 positions which is followed by a 2-fold degenerate site in the 1st codon position of the next  
523 codon
- 524 (B) A 4-fold degenerate site in the 3rd codon position followed by a 2-fold degenerate site in the  
525 1st codon position of the next codon, which is followed by a constant base in the 2nd codon  
526 position of the second codon.
- 527 (C) A 4-fold degenerate site in the 3rd codon position followed by a constant 1st codon position  
528 in the second codon of which the 2nd position is disregarded and by a 4-fold degenerate site  
529 in the 3rd codon position.
- 530 (D) An example calculation of the DF under the null model syn\_33 and an example calculation  
531 of the DF in an NS codon double substitution.
- 532 (E) Comparison of DF between the two null models, syn\_31 (adjacent synonymous  
533 substitutions) and syn\_33 (non-adjacent synonymous substitutions). The difference between

534 the two distributions is significant according to t-test ( $p\text{-val}=0.0038$ ) but not significant with a  
 535 Utest ( $p\text{-val}=0.104$ ).

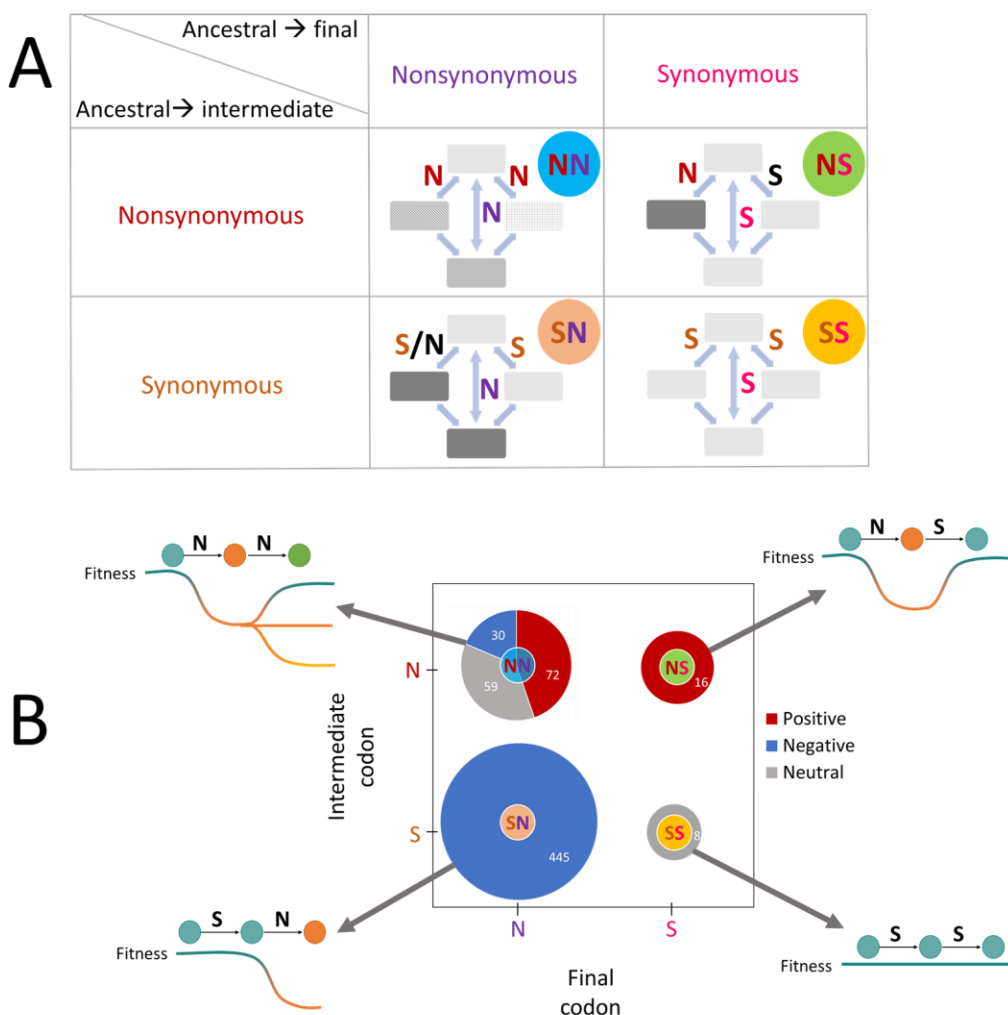

536

537 **Figure 2. Classification of the double codon substitutions.**

538 (A) Four combinations of codon double substitutions based on synonymy of ancestral and  
 539 derived (final) codons, and synonymy of intermediate state codons to the ancestral codons.

540 (B) Selective pressure in different codon double substitutions classes. **Positive**, cases  
 541 compatible with positive selection, where a codon double substitution has a significantly  
 542 higher DF than the corresponding double synonymous substitution. **Negative**, cases  
 543 compatible with purifying selection, where a codon double substitution has a significantly  
 544 lower DF than the corresponding double synonymous substitution. **Neutral**, cases where the  
 545 codon DF was not significantly different from that of the corresponding synonymous DF.

546

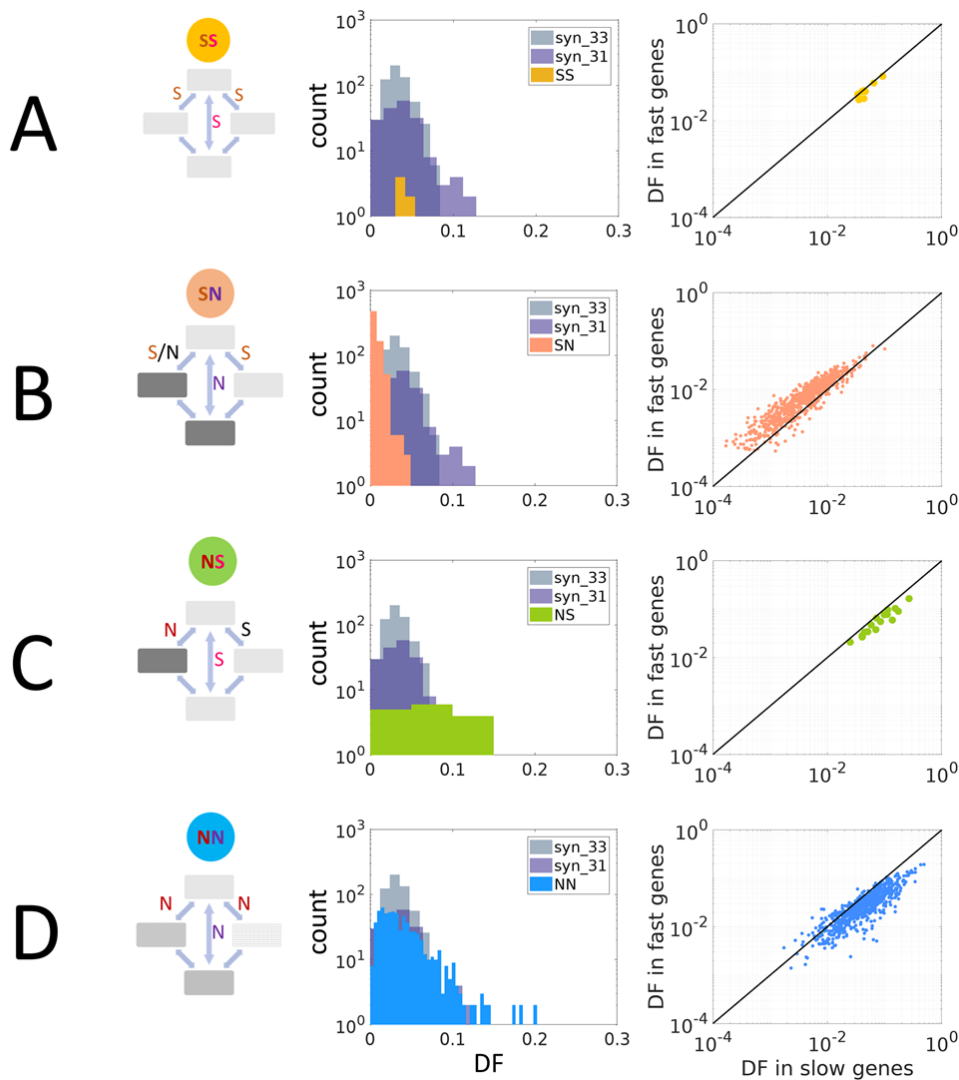

547

548 **Figure 3. Selective regimes of the codon double substitutions**

549 The panels on the left show the comparison of each codon double substitution class  
 550 to the double synonymous null models, and the panels to the right show the  
 551 comparisons between the DF of each of the classes in fast vs. slow evolving genes.

552 (A) SS, double synonymous codon substitutions

553 (B) SN, at least one synonymous intermediate codon, non-synonymous final codon

554 (C) NS, one non-synonymous intermediate, synonymous final codon

555 (D) NN – both intermediates and the final codon are non-synonymous to the  
 556 ancestral.

557

558

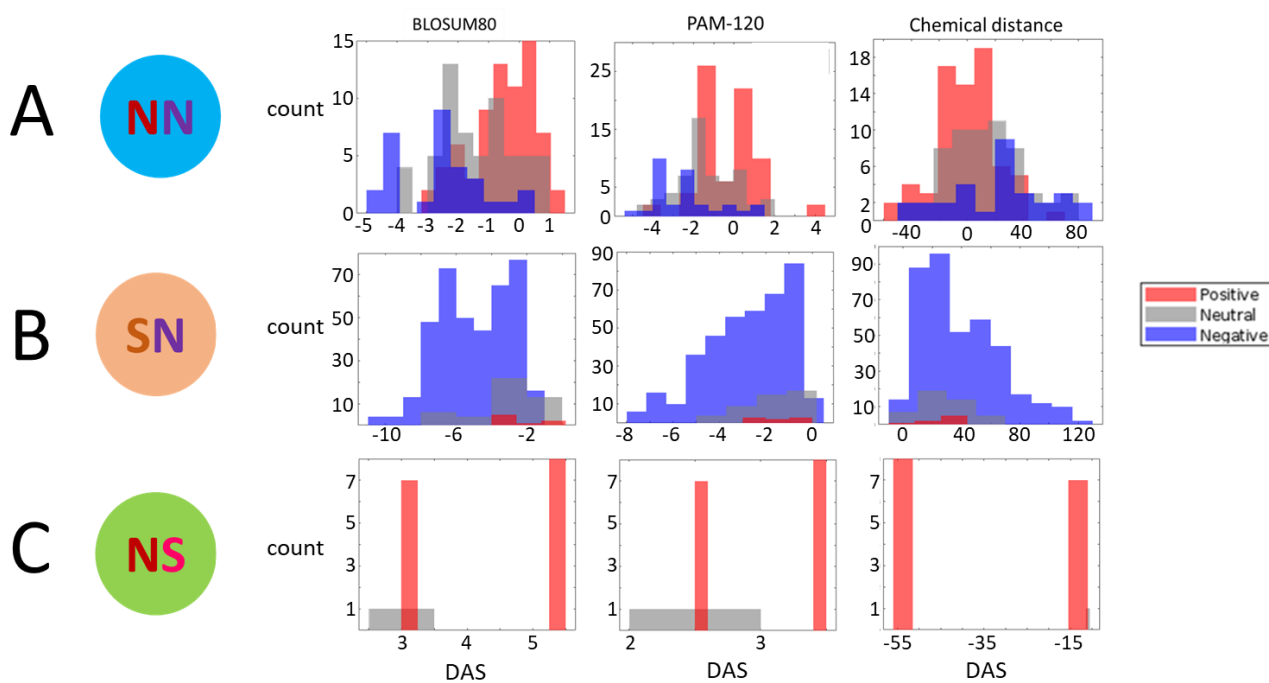

559

560

561

562

**Figure 4. Similarity between the ancestral, intermediate and final amino acids for different classes of double substitutions**

563 The DAS metric measures the difference in amino acid similarity/distance for the  
 564 original → final vs. original → intermediate codons.  $DAS = AA \text{ similarity (original} \rightarrow \text{final)}$   
 565  $- \text{ average AA similarity (original} \rightarrow \text{intermediate)}$ . Three comparisons, using different  
 566 amino acid similarity/distance matrices, are shown.

567 (A) NN double substitutions

568 (B) SN double substitutions

569 (C) NS double substitutions.

570

571
